# Supplementary material
Source: publisher site journal article supplement (https://www.dovepress.com/article/498996)
Supplement: Supplementary file 1 [file get_supplementary_file.php]

Supplementary materials

Linear assumption tests of two SEMs

To test the linear assumptions of the two models in our results, two methods were employed. First of all, a scatterplot was plotted for each path in the model to visually inspect the linear relationship between variables. The blue line in the figure is the linear fit line, which is based on ordinary least squares (OLS) regression, represented as Y=β0+β1X (Y = dependent variable, X = independent variable).1 The red line is locally estimated scatterplot smoothing (LOESS) curve, which captures potential nonlinear trends using local polynomial fitting. If the red LOESS curve closely aligns with the blue linear fit, the relationship is approximately linear. If the LOESS curve deviates significantly from the linear fit (e.g., U-shaped), the linear assumption may be violated. Secondly, quadratic term regression was performed to further confirm whether the linear relationship is significant statistically.2 We compare the linear model (Y=β0+β1X) with non-linear model (Y=β0+β1X+β2X2) using ANOVA, *p* value corrected with False Discovery Rate (FDR).3 If non-linear model significantly outperforms linear model (i.e., the quadratic term coefficient β2​≠0 with *p* < 0.05), the linear assumption is rejected.

As indicated in Supplementary Figure 1A, 1D and 1E, LOESS curve closely aligns with linear fit, implying there is a linear relationship between erythrocyte and WBC, P1_orienting and N1_orienting, N1_orienting and executive control. Supplementary Figure 1B suggested that there may be a non-linear relationship between WBC and sleep distraction, but quadratic term regression suggested this non-linear relationship is insignificant (FDR adjusted *p* = 0.8408, Supplementary Table 1). Besides, the liner relationship of all the other paths were all proved (all FDR adjusted *p* > 0.05, Supplementary Table 1) by quadratic term regression. Therefore, it can be concluded that the linear assumption of the sleep to attention model was solid.


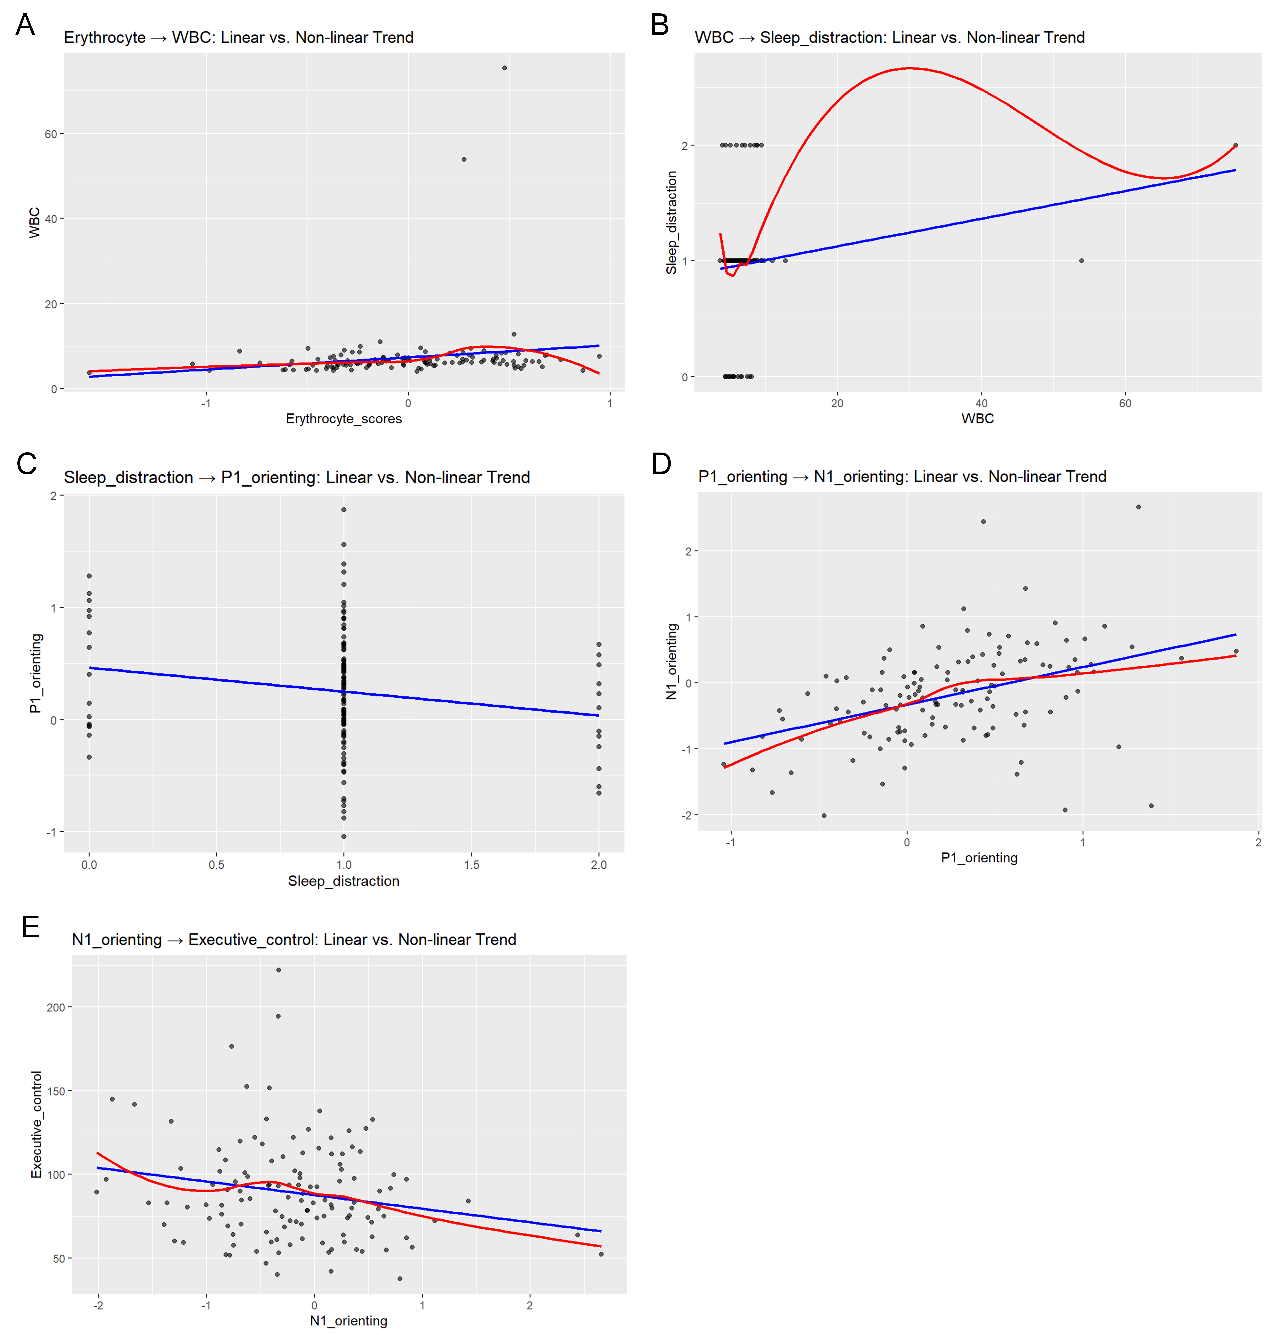


**Supplementary Figure 1** **Scatterplot inspection of the linear relationship of Erythrocyte to Executive control model.** Scatterplot of **A** erythrocyte and WBC **B** WBC and Sleep distraction **C** Sleep distraction and P1_orienting **D** P1_orienting and N1_orienting **E** N1_orienting and Executive control with linear fit (blue line) and nonparametric locally estimated scatterplot smoothing (LOESS) smooth curve (red line).

**Supplementary Table 1 Quadratic term test of each path in the biological model of sleep’s effect on attention**

| Path | Quadratic Term Test | | Linear Assumption Holds? |
| --- | --- | --- | --- |
| p-value | Adjusted p-value |
| Erythrocyte → WBC | 0.0699 | 0.2840 | Yes |
| WBC → Sleep distraction | 0.7620 | 0.8408 | Yes |
| Sleep distraction → P1_orienting | 0.8408 | 0.8408 | Yes |
| P1_orienting → N1_orienting | 0.1136 | 0.2840 | Yes |
| N1_orienting → Executive control | 0.5352 | 0.8408 | Yes |

As shown in Supplementary Figure 2A, 2C, 2D and 2E, LOESS curve closely aligns with linear fit, implying there is a linear relationship between erythrocyte and WBC, b_CFS and executive control, executive control and PSQI, PSQI and SCL_90. Supplementary Figure 2B suggested that there may be a non-linear relationship between WBC and b_CFS, but quadratic term regression suggested this non-linear relationship is insignificant (FDR adjusted *p* = 0.4205, Supplementary Table 2). Besides, the liner relationship of all the other paths were all proved (all FDR adjusted *p* > 0.05, Supplementary Table 2). To conclude, the linear assumption of the attention to sleep model was also confirmed.


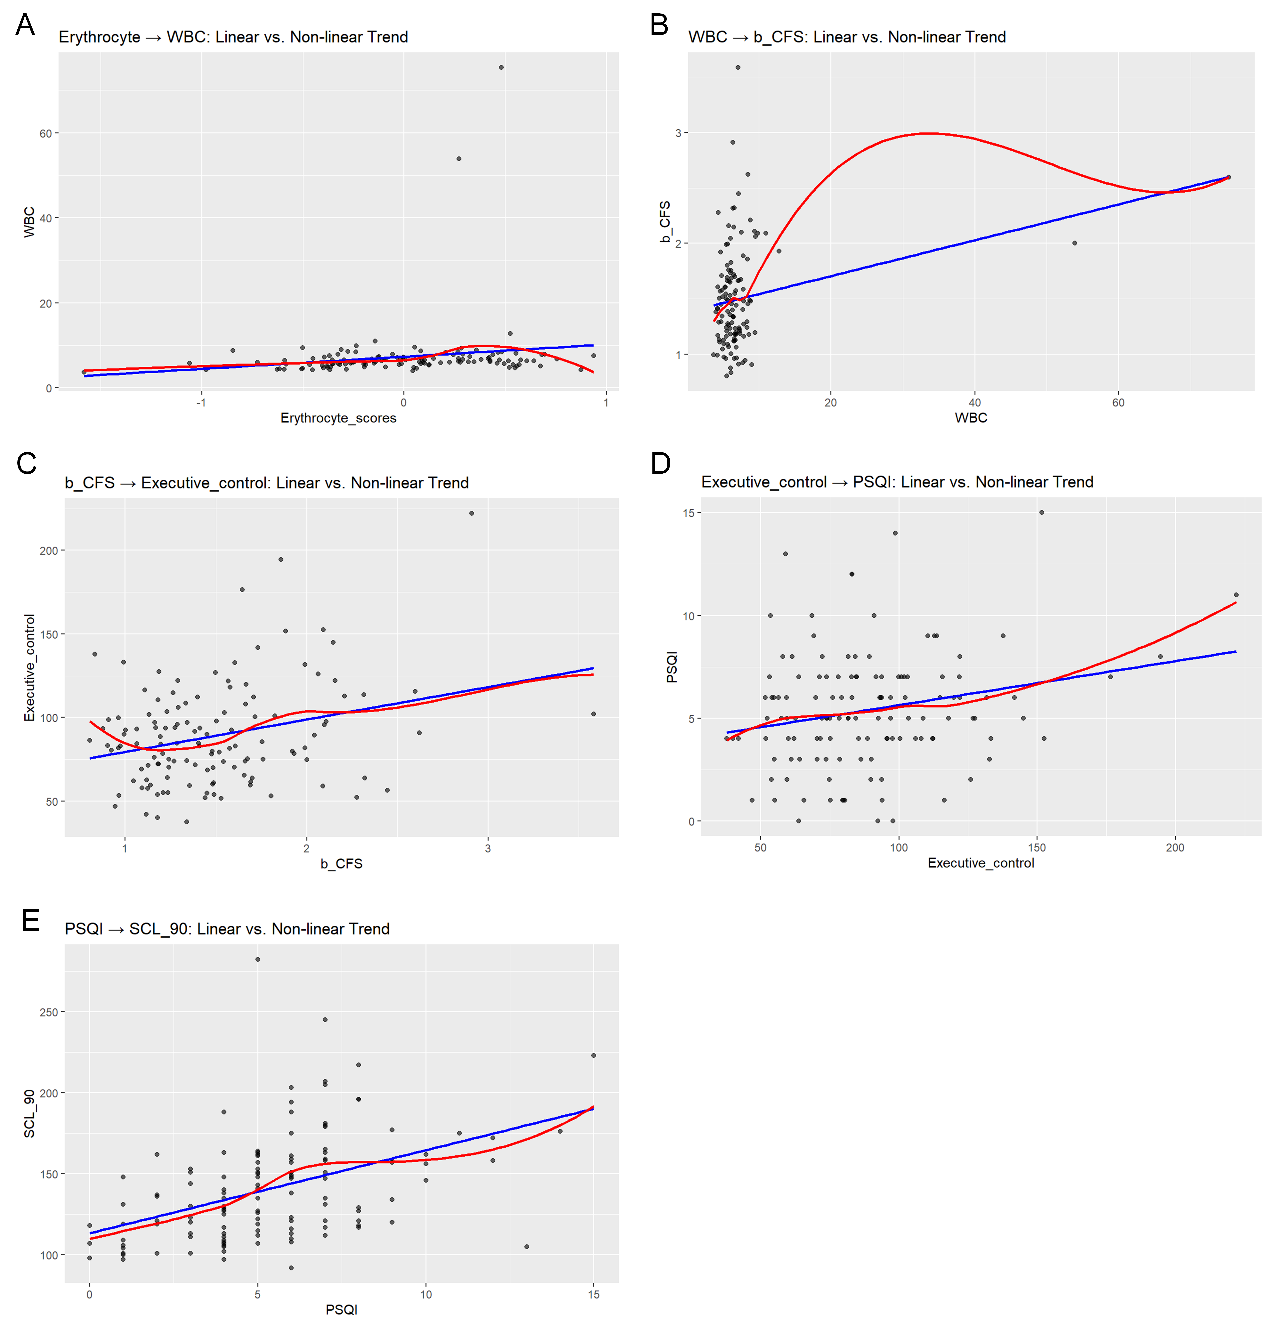


**Supplementary Figure 2** **Scatterplot inspection of the linear relationship of Erythrocyte to SCL_90 model.** Scatterplot of **A** erythrocyte and WBC **B** WBC and b_CFS **C** b_CFS and Executive control **D** Executive control and PSQI **E** PSQI and SCL_90 with linear fit (blue line) and nonparametric locally estimated scatterplot smoothing (LOESS) smooth curve (red line).

**Supplementary Table 2 Quadratic term test of each path in the biological model of attention’s effect on sleep**

| Path | Quadratic Term Test | | Linear Assumption Holds? |
| --- | --- | --- | --- |
| p-value | Adjusted p-value |
| Erythrocyte → WBC | 0.0699 | 0.3495 | Yes |
| WBC → b_CFS | 0.3364 | 0.4205 | Yes |
| b_CFS → Executive control | 0.6045 | 0.6045 | Yes |
| Executive control → PSQI | 0.2763 | 0.4205 | Yes |
| PSQI → SCL_90 | 0.2439 | 0.4205 | Yes |

**References**

1. Cleveland WS. Visualizing Data. Hobart Press; 1993.

2. Cohen J, Cohen P, West SG, Aiken LS. Applied Multiple Regression/Correlation Analysis for the Behavioral Sciences. 3rd ed. Routledge; 2013. doi:10.4324/9780203774441

3. Benjamini Y, Hochberg Y. Controlling the False Discovery Rate: A Practical and Powerful Approach to Multiple Testing. Journal of the Royal Statistical Society: Series B (Methodological). 1995;57(1):289-300. doi:10.1111/j.2517-6161.1995.tb02031.x
